# Supplementary material for: Associations between NK Cells in Different Immune Organs and Cellular SIV DNA and RNA in Regional HLADR− CD4+ T Cells in Chronically SIVmac239-Infected, Treatment-Naïve Rhesus Macaques
Source: MDPI journal article supplement (doi:10.3390/v14112513), 2022-11-13
Supplement: s1 [file s1]

## **Supplementary material**

**Title: Associations between NK Cells in Different Immune Organs and Cellular SIV DNA and RNA in Regional HLADR<sup>-</sup> CD4<sup>+</sup> T Cells in Chronically SIV<sub>mac239</sub>-Infected, Treatment-Naïve Rhesus Macaques**

## Supplementary Figures and Tables

### 1 Supplementary Table

**Table S1. The characteristics of SIV-infected Chinese rhesus macaques in this study.**

| <b>Animal<br/>No.</b> | <b>Sex</b> | <b>Weight<br/>(kg)</b> | <b>Age (months)</b> | <b>Viral stock</b>     | <b>Routine of<br/>inoculation</b> | <b>Viral<br/>quantification</b> | <b>Time of<br/>inoculation</b> | <b>Time of<br/>euthanasia</b> |
|-----------------------|------------|------------------------|---------------------|------------------------|-----------------------------------|---------------------------------|--------------------------------|-------------------------------|
| <b>G0101R</b>         | F          | 4.15                   | 49                  | SIV <sub>mac</sub> 239 | Ir                                | 100 TCID <sub>50</sub>          | Jan 3, 2013                    | Jan 21, 2015                  |
| <b>G0102R</b>         | F          | 4.25                   | 51                  | SIV <sub>mac</sub> 239 | Ir                                | 100 TCID <sub>50</sub>          | Jan 3, 2013                    | Jan 21, 2015                  |
| <b>G0104R</b>         | F          | 4.55                   | 54                  | SIV <sub>mac</sub> 239 | Ir                                | 100 TCID <sub>50</sub>          | Jan 3, 2013                    | Jan 21, 2015                  |
| <b>G0105R</b>         | F          | 4.8                    | 47                  | SIV <sub>mac</sub> 239 | Ir                                | 100 TCID <sub>50</sub>          | Jan 3, 2013                    | Jan 21, 2015                  |
| <b>G0106R</b>         | F          | 3.9                    | 55                  | SIV <sub>mac</sub> 239 | Ir                                | 100 TCID <sub>50</sub>          | Jan 3, 2013                    | Jan 21, 2015                  |

Ir, intrarectally; SIV, simian immunodeficiency virus; TCID, tissue culture infectious dose.

## 2 Supplementary Figures

### Supplementary Figure S1

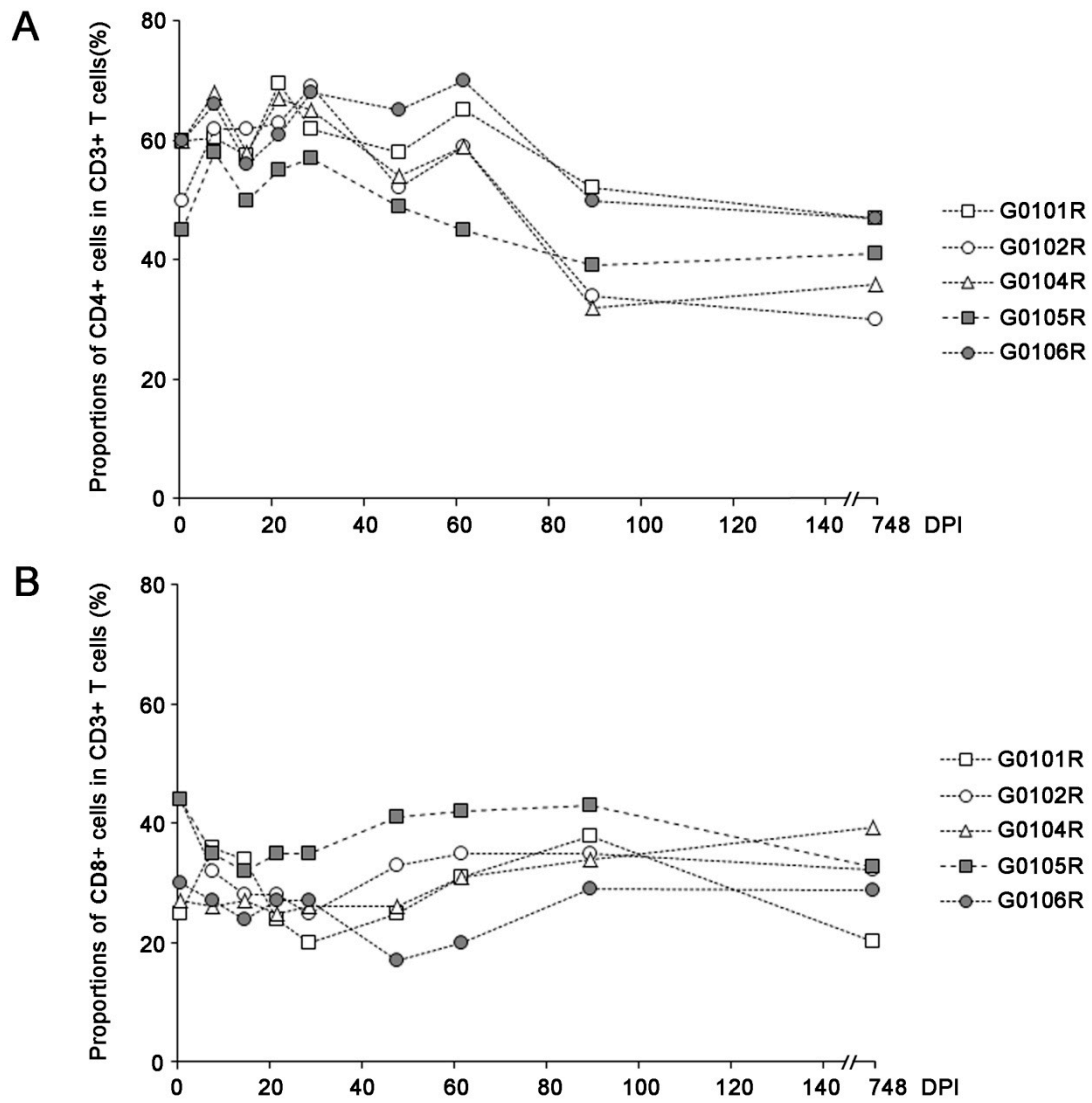

Figure S1. Dynamics of peripheral CD4<sup>+</sup> T and CD8<sup>+</sup> T cell counts in the bloodstream of 5 SIV-infected Chinese Rhesus macaques.

Supplementary Figure S2

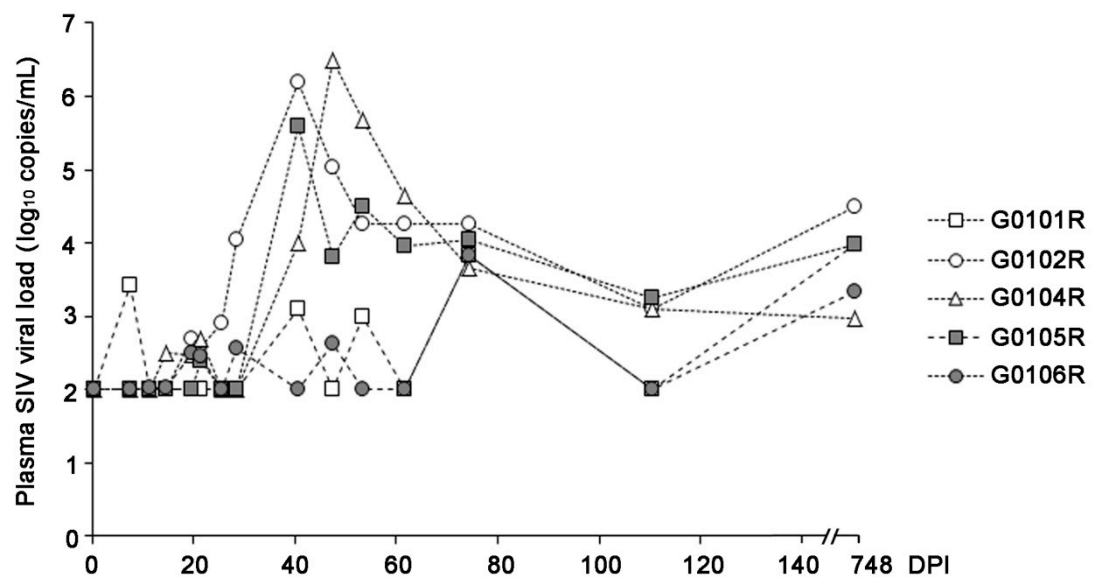

Figure S2. Dynamics of plasma SIV viral load in 5 SIV-infected Chinese Rhesus Macaques.
